# Supplementary material
Source: PubMed Central journal article supplement (PMC2995350)
Supplement: blood-2009-06-229369_1.pdf [file blood-2009-06-229369_1.pdf]

| <b>Organ or system</b>                   | <b>Questions</b>                                                                                                  | <b>Grade</b> |
|------------------------------------------|-------------------------------------------------------------------------------------------------------------------|--------------|
| <b>Hearing</b>                           | <b><i>Have you ever been told by a doctor or other health care professional that you have, or have had...</i></b> |              |
|                                          | Problems hearing sounds, words, or language in crowds                                                             | 1            |
|                                          | Hearing loss requiring a hearing aid                                                                              | 2            |
|                                          | Deafness in one or both ears not completely corrected by hearing aid                                              | 3            |
|                                          | Complete deafness in either ear                                                                                   | 3            |
| <b>Vision</b>                            | <b><i>Have you ever been told by a doctor or other health care professional that you have, or have had...</i></b> |              |
|                                          | Cataracts, but did not require surgery                                                                            | 1            |
|                                          | Glaucoma (excess pressure in eyeball)                                                                             | 1            |
|                                          | Cataracts that required surgery                                                                                   | 2            |
|                                          | Problems with double vision                                                                                       | 2            |
|                                          | Very dry eyes requiring eye drops or ointment                                                                     | 2            |
|                                          | A detached retina or other condition of retina                                                                    | 2            |
|                                          | Legally blind in one or both eyes                                                                                 | 3            |
|                                          | Loss of an eye                                                                                                    | 3            |
| <b>Oral</b>                              | <b><i>Have you ever been told by a doctor or other health care professional that you have, or have had...</i></b> |              |
|                                          | Stammering or stuttering                                                                                          | 1            |
|                                          | Abnormal sense of taste                                                                                           | 1            |
|                                          | Loss of taste or smell which has lasted at least 3 months                                                         | 1            |
|                                          | Problems with gums: bleeding or swelling                                                                          | 1            |
|                                          | Abnormally dry mouth                                                                                              | 1            |
| <b>Genitourinary</b>                     | <b><i>Have you ever been told by a doctor or other health care professional that you have, or have had...</i></b> |              |
|                                          | Kidney stones                                                                                                     | 1            |
|                                          | Repeated kidney infections                                                                                        | 2            |
|                                          | Repeated bladder infections                                                                                       | 2            |
|                                          | Dialysis                                                                                                          | 4            |
|                                          | Kidney transplant                                                                                                 | 4            |
| <b>Endocrine</b>                         | <b><i>Have you ever been told by a doctor or other health care professional that you have, or have had...</i></b> |              |
|                                          | An underactive thyroid gland (Hypothyroid) not requiring medication                                               | 1            |
|                                          | An underactive thyroid gland (Hypothyroid), requiring you to be on medication                                     | 2            |
|                                          | Thyroid nodules, not requiring surgery                                                                            | 2            |
|                                          | Diabetes, requiring oral medications                                                                              | 2            |
|                                          | Have you ever received injections of growth hormone (Protropin or Humatrope)                                      | 2            |
|                                          | An overactive thyroid gland (Hyperthyroid)                                                                        | 3            |
|                                          | Thyroid nodules, requiring removal of all or part of the thyroid gland                                            | 3            |
| Diabetes, requiring you to be on insulin | 3                                                                                                                 |              |
| <b>Musculoskeletal</b>                   | <b><i>Have you ever been told by a doctor or other health care professional that you have, or have had...</i></b> |              |
|                                          | Osteoporosis, brittle, weak or fragile bones                                                                      | 2            |
|                                          | Avascular necrosis (deterioration of joint bones such as hip or shoulder joint)                                   | 2            |
|                                          | Joint replacement                                                                                                 | 3            |

| <b>Organ or system</b>                                              | <b>Questions</b>                                                                                                                                  | <b>Grade</b> |
|---------------------------------------------------------------------|---------------------------------------------------------------------------------------------------------------------------------------------------|--------------|
| <b>Cardiac</b>                                                      | <b><i>Have you ever been told by a doctor or other health care professional that you have, or have had...</i></b>                                 |              |
|                                                                     | Irregular heartbeat or palpitations, (Arrhythmia) not requiring medication or follow-up by a doctor                                               | 1            |
|                                                                     | Hypertension (high blood pressure), not requiring medication                                                                                      | 1            |
|                                                                     | Stiff or leaky heart valves                                                                                                                       | 1            |
|                                                                     | Congestive heart failure or cardiomyopathy (weak heart muscle), not requiring medication                                                          | 2            |
|                                                                     | Irregular heartbeat or palpitations, (Arrhythmia) requiring medication or follow-up by a doctor                                                   | 2            |
|                                                                     | Hypertension (high blood pressure), requiring medication                                                                                          | 2            |
|                                                                     | A myocardial infarction (heart attack)                                                                                                            | 3            |
|                                                                     | Coronary heart disease not requiring catheterization ("heart cath") or surgery but on medication such as nitroglycerine                           | 3            |
|                                                                     | Angina pectoris (chest pain due to lack of oxygen to heart requiring medication such as nitroglycerine)                                           | 3            |
|                                                                     | Congestive heart failure or cardiomyopathy (weak heart muscle), requiring medication                                                              | 3            |
|                                                                     | Blood clot in lung, arm, leg or pelvis                                                                                                            | 3            |
|                                                                     | Heart attack, requiring catheterization ("heart cath"), angioplasty (enlarging a heart vessel using a balloon), or coronary artery bypass surgery | 4            |
|                                                                     | A stroke or a cerebrovascular accident                                                                                                            | 4            |
| Heart transplant                                                    | 4                                                                                                                                                 |              |
| <b>Respiratory</b>                                                  | <b><i>Have you ever been told by a doctor or other health care professional that you have, or have had...</i></b>                                 |              |
|                                                                     | Chronic cough or shortness of breath for greater than one month                                                                                   | 1            |
|                                                                     | Lung fibrosis or "scarring" of the lung, not requiring extra oxygen                                                                               | 1            |
|                                                                     | Emphysema, not requiring medication                                                                                                               | 1            |
|                                                                     | Lung fibrosis or "scarring" of the lung, requiring extra oxygen                                                                                   | 3            |
|                                                                     | Emphysema, requiring medication                                                                                                                   | 3            |
| Lung transplant                                                     | 4                                                                                                                                                 |              |
| <b>Gastrointestinal</b>                                             | <b><i>Have you ever been told by a doctor or other health care professional that you have, or have had...</i></b>                                 |              |
|                                                                     | Hepatitis                                                                                                                                         | 2            |
|                                                                     | Rectal or anal fistula                                                                                                                            | 2            |
|                                                                     | Cirrhosis of the liver                                                                                                                            | 3            |
|                                                                     | Rectal or anal stricture (narrowing or scarring)                                                                                                  | 3            |
|                                                                     | Surgery for intestinal obstruction                                                                                                                | 3            |
| Liver transplant                                                    | 4                                                                                                                                                 |              |
| <b>Neurological</b>                                                 | <b><i>Have you ever been told by a doctor or other health care professional that you have, or have had...</i></b>                                 |              |
|                                                                     | Epilepsy not requiring medications                                                                                                                | 1            |
|                                                                     | Repeated seizures, convulsions, or black outs not requiring medications                                                                           | 1            |
|                                                                     | Problems with balance, equilibrium, or ability to reach for/manipulate objects                                                                    | 1            |
|                                                                     | Persistent dizziness or vertigo                                                                                                                   | 1            |
|                                                                     | Tremors or problems with movement                                                                                                                 | 1            |
|                                                                     | Weakness or inability to move leg(s) or arm(s), with minimal impairment                                                                           | 1            |
|                                                                     | Decreased sense of touch or feeling in hands, fingers, arms or legs                                                                               | 1            |
|                                                                     | Epilepsy requiring medications                                                                                                                    | 2            |
|                                                                     | Repeated seizures, convulsions, or black outs requiring medications                                                                               | 2            |
| Weakness or inability to move leg(s) or arm(s), moderate impairment | 2                                                                                                                                                 |              |

| Organ or system   | Questions                                                                                                  | Grade |
|-------------------|------------------------------------------------------------------------------------------------------------|-------|
| Second malignancy | <i>Have you ever been told by a doctor or other health care professional that you have, or have had...</i> |       |
|                   | Basal cell cancer                                                                                          | 2     |
|                   | Thyroid cancer                                                                                             | 3     |
|                   | Any other type of cancer                                                                                   | 4     |
